# Supplementary material for: Design and Research of Automatic Garment-Pattern-Generation System Based on Parameterized Design
Source: MDPI journal article supplement (doi:10.3390/su15021268), 2023-01-09
Supplement: s1 [file s1]

# Supplementary document

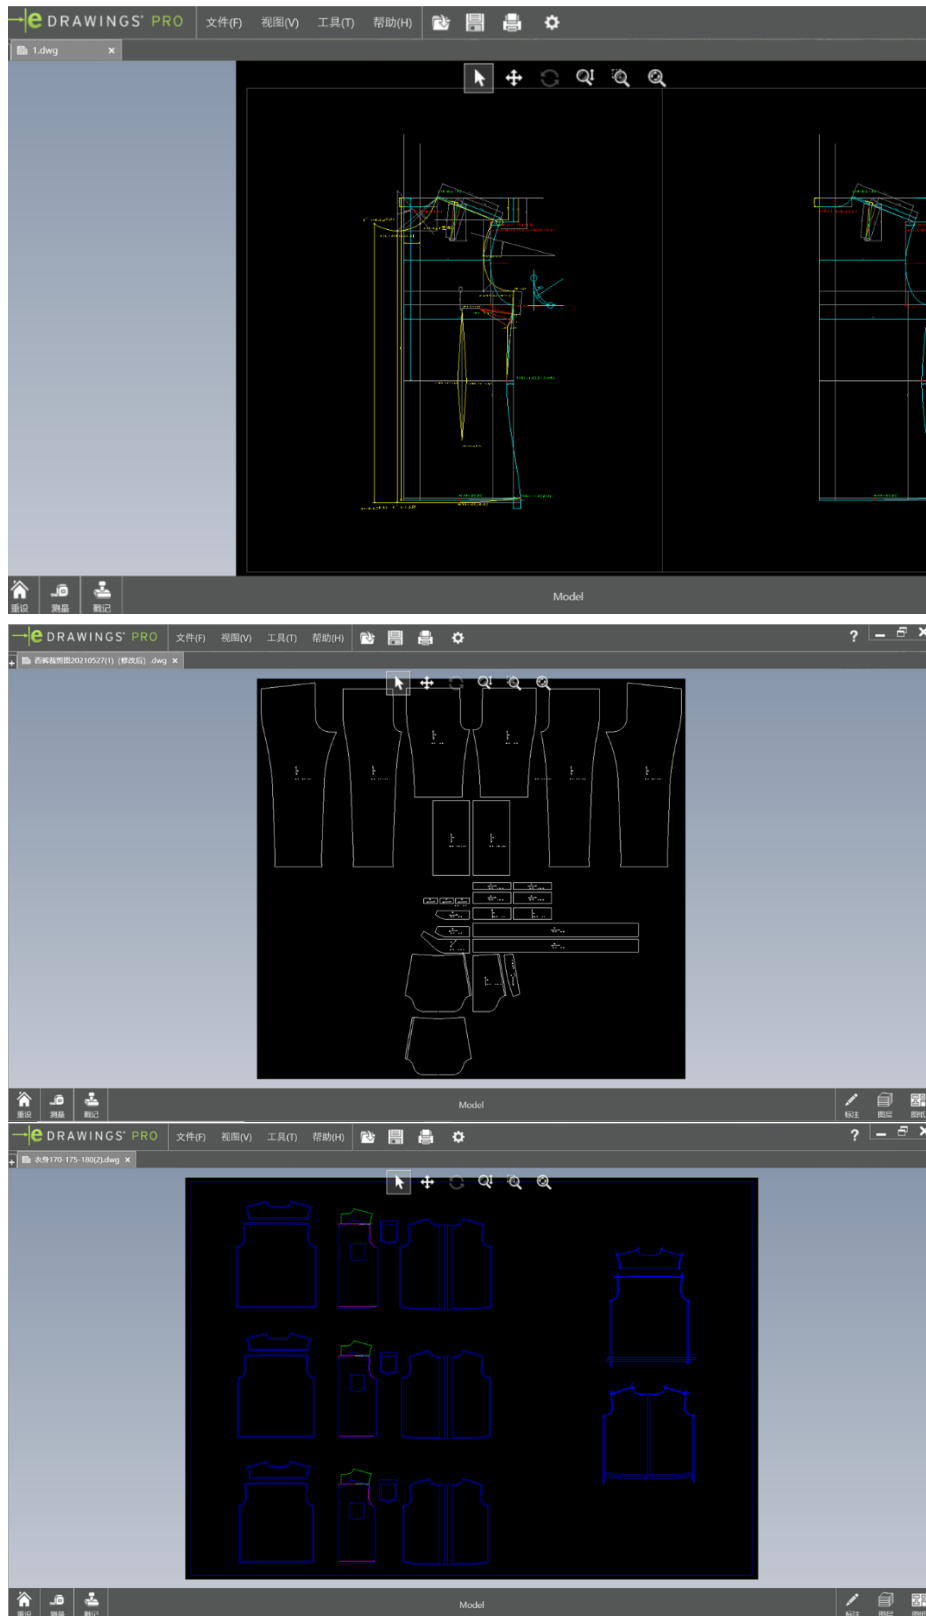

**Figure S1.** Patterns drawn after secondary development of other mapping software

**Figure S2.** Parameterized coordinate points of the original model

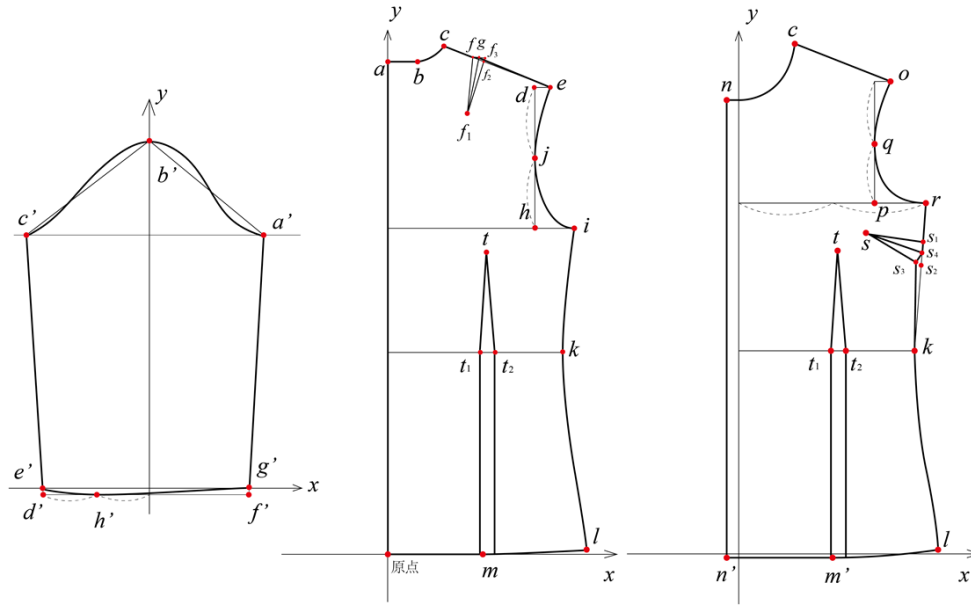

**Table S1.** Parameterized coordinate points of the original model

|      | Point | Parameter coordinates                                  |
|------|-------|--------------------------------------------------------|
| Back | a     | $(0, L)$                                               |
|      | b     | $(N/10, L)$                                            |
|      | c     | $(N/5, L+2)$                                           |
|      | d     | $(1.5*B/10+4.5, [L-(B/20+0.5)])$                       |
|      | e     | $(1.5*B/10+4.5+2, [L-(B/20+0.5)])$                     |
|      | f     | $c+[ (e-c)/ e-c ]*4$                                   |
|      | g     | $(f+z')/2$                                             |
|      | h     | $(1.5*B/10+4.5, [L-(B/20+0.5)]-B/10+8.5)$              |
|      | j     | $(1.5*B/10+4.5, [2*[L-(B/20+0.5)]-(B/10+8.5)]/2)$      |
|      | i     | $(B/4, [L-(B/20+0.5)]-B/10+8.5)$                       |
|      | k     | $(B/4-1.5, L+2-4)$                                     |
|      | l     | $(B/4+1.5, 0.5)$                                       |
|      | m     | $(B/8, 0)$                                             |
|      | o     | $(0, 0)$                                               |
|      | v     | $(B/8+0.7, [L+20-(B/20)-(B/10+6)]-4)$                  |
|      | v1    | $(B/8+0.7-1, L+2-4)$                                   |
|      | v2    | $(B/8+0.7+1, L+2-4)$                                   |
|      | n     | $(L-N/5, -1.5)$                                        |
|      | o     | $(3.5, C.N.)$                                          |
|      | c     | $(N/5, L+2)$                                           |
|      | q     | $(N/5+housian\_lenght**2-(B/20)**2, [L+20-(B/20)])$    |
|      | s     | $(1.5*B/10+3, [L+20-(B/20)]+[L+20-(B/20)-(B/10+6)]/2)$ |
|      | r     | $(1.5*B/10+3, [L+20-(B/20)-(B/10+6)])$                 |
|      | t     | $(B/4, [L+20-(B/20)-(B/10+6)])$                        |

|        |    |                                                                                                              |
|--------|----|--------------------------------------------------------------------------------------------------------------|
| Front  | U  | \                                                                                                            |
|        | U1 | \                                                                                                            |
|        | U3 |                                                                                                              |
|        | U2 | $u + [ (u2-u)/ u2-u  ] *  u1-u $                                                                             |
|        | k  | $(B/4-1.5, L+2-4)$                                                                                           |
|        | l  | $(B/4+1.5, c)$                                                                                               |
|        | m' | $(B/8, -c)$                                                                                                  |
|        | n' | $(-3c, 0)$                                                                                                   |
|        | p  | $(-b, -c)$                                                                                                   |
|        | o' | $(-b, C.N.)$                                                                                                 |
|        | v  | $(B/8+0.7, [L+20-(B/20)-(B/10+6)]-4)$                                                                        |
|        | v1 | $(B/8+0.7-1, L+2-4)$                                                                                         |
|        | v2 | $(B/8+0.7+1, L+2-4)$                                                                                         |
| Sleeve | a' | $(\sqrt{FAH^2 - (B/10 + 30)^2}, S.L. - C.W. - S.T.)$                                                         |
|        | b' | $(0, SL-CW)$                                                                                                 |
|        | c' | $(\sqrt{-[BAH^2 - (B/10 + 30)^2]}, S.L. - C.W. - S.T.)$                                                      |
|        | d' | $(-2a, -1)$                                                                                                  |
|        | e' | $(d + \vec{dc} / \sqrt{\{ \sqrt{-[BAH^2 - (B/10 + 30)^2]} + 14 \}^2 + (S.L. - C.W. - S.T.)^2} \times 10, 0)$ |
|        | f' | $(2a-1, -1)$                                                                                                 |
|        | g' | $(f + \vec{fa} / \sqrt{\{ \sqrt{FAH^2 - (B/10 + 30)^2} - 13 \}^2 + (S.L. - C.W. - S.T.)^2} \times 10, 0)$    |
|        | h' | $(-a, -1)$                                                                                                   |

**Table S2.** Baseline body size data of the participants

| No. | Height/cm | Neck<br>circumference/cm | Chest<br>circumference/cm | Shoulder<br>width/cm | Waist/cm | Back<br>length/cm | Sleeve<br>length/cm |
|-----|-----------|--------------------------|---------------------------|----------------------|----------|-------------------|---------------------|
| 1   | 156       | 31                       | 78                        | 37                   | 60       | 38                | 50                  |
| 2   | 163       | 33                       | 88                        | 38                   | 70       | 39                | 52                  |
| 3   | 168       | 36                       | 100                       | 41                   | 73       | 40                | 54                  |
| 4   | 172       | 34                       | 83                        | 41                   | 68       | 42                | 55                  |
| 5   | 154       | 32                       | 90                        | 37                   | 59       | 37                | 51                  |
| 6   | 161       | 33                       | 89                        | 39                   | 71       | 39                | 50                  |
| 7   | 171       | 34                       | 101                       | 39                   | 70       | 40                | 52                  |
| 8   | 160       | 36                       | 89                        | 38                   | 67       | 38                | 51                  |
| 9   | 159       | 36                       | 93                        | 39                   | 64       | 42                | 53                  |
| 10  | 164       | 35                       | 99                        | 38                   | 76       | 40                | 50                  |
| 11  | 163       | 35                       | 99                        | 40                   | 64       | 42                | 53                  |
| 12  | 165       | 36                       | 106                       | 40                   | 61       | 93                | 53                  |
| 13  | 159       | 33                       | 96                        | 37                   | 71       | 41                | 51                  |
| 14  | 157       | 34                       | 97                        | 38                   | 62       | 93                | 53                  |
| 15  | 170       | 33                       | 85                        | 37                   | 67       | 40                | 53                  |
| 16  | 163       | 34                       | 85                        | 39                   | 66       | 39                | 53                  |
| 17  | 158       | 32                       | 98                        | 36                   | 71       | 39                | 50                  |
| 18  | 158       | 33                       | 81                        | 38                   | 68       | 40                | 53                  |
| 19  | 161       | 34                       | 79                        | 38                   | 68       | 41                | 53                  |
| 20  | 164       | 35                       | 82                        | 39                   | 64       | 40                | 52                  |
| 21  | 159       | 33                       | 95                        | 39                   | 71       | 41                | 51                  |
| 22  | 155       | 33                       | 87                        | 36                   | 71       | 39                | 50                  |
| 23  | 175       | 38                       | 88                        | 43                   | 76       | 44                | 55                  |
| 24  | 161       | 34                       | 86                        | 36                   | 67       | 39                | 51                  |
| 25  | 168       | 34                       | 84                        | 37                   | 68       | 41                | 52                  |
| 26  | 163       | 33                       | 95                        | 36                   | 71       | 39                | 50                  |
| 27  | 159       | 34                       | 86                        | 38                   | 68       | 39                | 53                  |
| 28  | 171       | 37                       | 91                        | 40                   | 72       | 40                | 52                  |
| 29  | 163       | 37                       | 89                        | 39                   | 71       | 38                | 50                  |
| 30  | 166       | 35                       | 91                        | 38                   | 68       | 42                | 53                  |
| 31  | 157       | 36                       | 103                       | 37                   | 59       | 40                | 52                  |
| 32  | 168       | 37                       | 83                        | 38                   | 68       | 39                | 51                  |
| 33  | 166       | 35                       | 87                        | 40                   | 67       | 41                | 53                  |
| 34  | 164       | 36                       | 85                        | 38                   | 71       | 42                | 50                  |
| 35  | 159       | 37                       | 91                        | 39                   | 65       | 39                | 52                  |
| 36  | 158       | 35                       | 89                        | 37                   | 69       | 39                | 53                  |
| 37  | 157       | 36                       | 84                        | 38                   | 65       | 40                | 50                  |
| 38  | 166       | 37                       | 88                        | 37                   | 64       | 39                | 51                  |
| 39  | 169       | 35                       | 86                        | 39                   | 63       | 41                | 52                  |
| 40  | 160       | 36                       | 80                        | 37                   | 69       | 41                | 52                  |
| 41  | 172       | 35                       | 88                        | 39                   | 67       | 39                | 52                  |
| 42  | 168       | 37                       | 84                        | 39                   | 66       | 40                | 50                  |
| 43  | 159       | 36                       | 85                        | 38                   | 69       | 39                | 52                  |
| 44  | 164       | 35                       | 89                        | 36                   | 72       | 41                | 50                  |
| 45  | 159       | 37                       | 96                        | 39                   | 64       | 40                | 52                  |
| 46  | 165       | 36                       | 101                       | 38                   | 62       | 40                | 52                  |
| 47  | 162       | 35                       | 90                        | 37                   | 66       | 41                | 50                  |
| 48  | 159       | 34                       | 91                        | 38                   | 72       | 39                | 52                  |
| 49  | 171       | 34                       | 89                        | 41                   | 65       | 41                | 52                  |
| 50  | 168       | 33                       | 87                        | 39                   | 64       | 40                | 51                  |
| 51  | 163       | 36                       | 97                        | 38                   | 70       | 38                | 52                  |
| 52  | 155       | 33                       | 84                        | 36                   | 68       | 39                | 51                  |
| 53  | 167       | 35                       | 89                        | 40                   | 64       | 40                | 50                  |

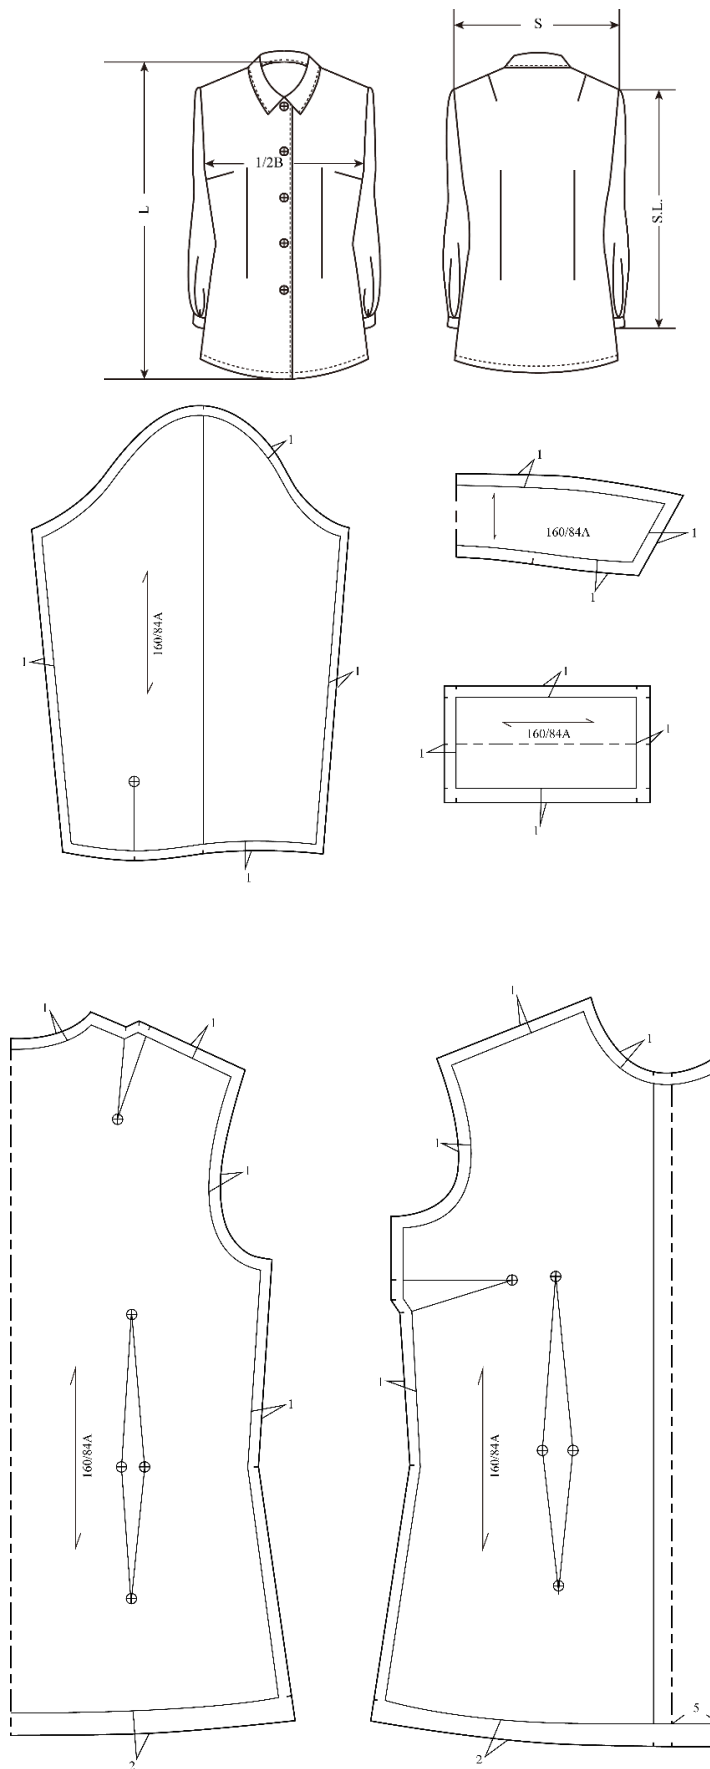

**Figure S3.** Structure diagram of style 1 shirt

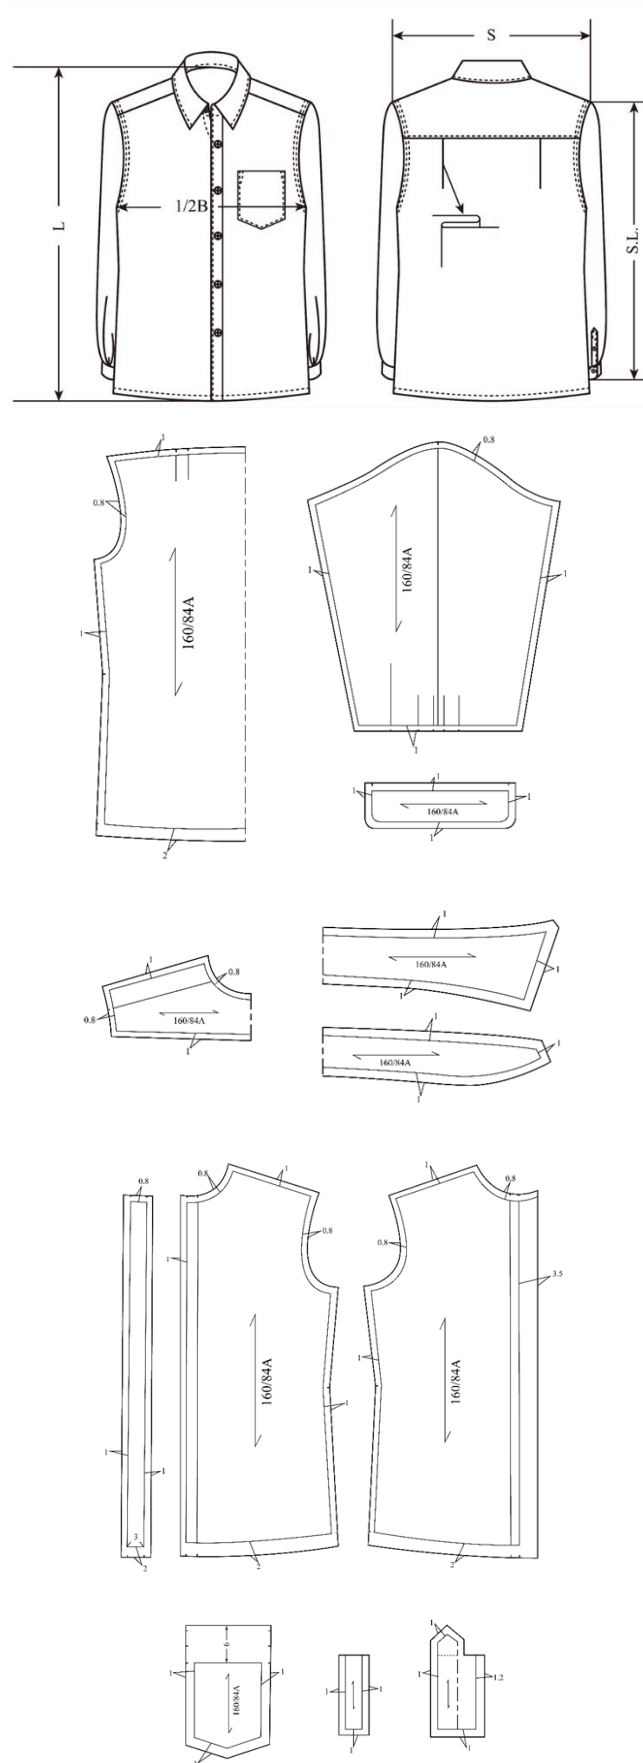

**Figure S4.** Structure diagram of style 2 shirt

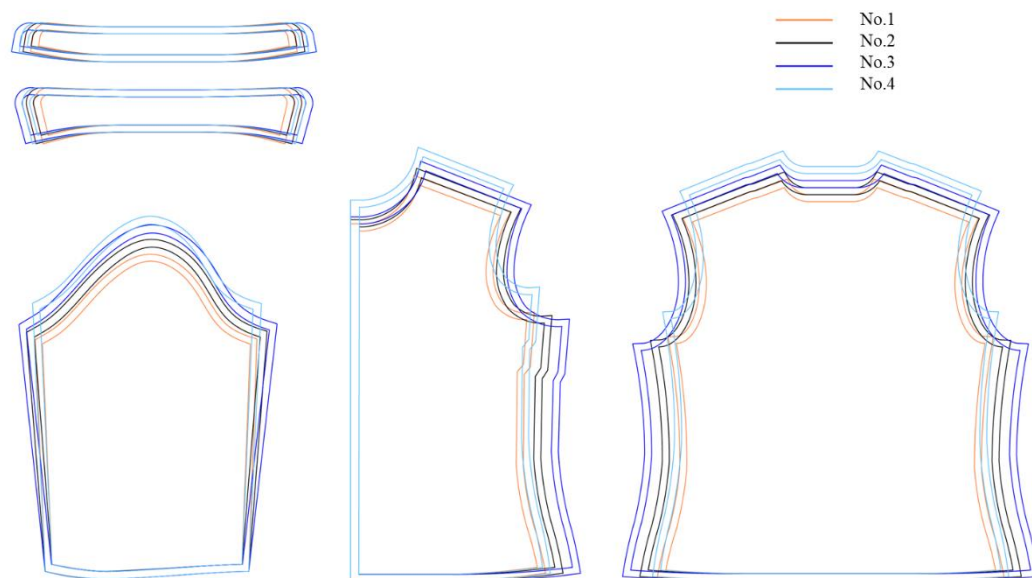

**Figure S5.** Style 1 pattern diagram for participants No.1-4
